# Supplementary material
Source: HighWire-hosted journal article supplement (https://bmjopengastro.bmj.com/highwire/filestream/1810/field_highwire_adjunct_files/0/bmjgast-2019-000352supp001_data_supplement.pdf)
Supplement: bmjgast-2019-000352supp001_data_supplement.pdf [file bmjgast-2019-000352supp001_data_supplement.pdf]

| <b>Supplementary Table 1:</b> International Classification of Diseases, ninth edition, clinical modification and clinical classifications software codes used to identify comorbidities, procedures and outcomes. |               |                |
|-------------------------------------------------------------------------------------------------------------------------------------------------------------------------------------------------------------------|---------------|----------------|
| <b>Variable</b>                                                                                                                                                                                                   | <b>Source</b> | <b>Code(s)</b> |
| Dyslipidemia                                                                                                                                                                                                      | CCS           | 53             |
| PCOS                                                                                                                                                                                                              | ICD-9-CM      | 256.4          |
| NAFLD                                                                                                                                                                                                             | ICD-9-CM      | 571.8          |
| Abbreviations: CCS = Clinical Classification Software; ICD-9-CM = International Classification of Diseases, Ninth Edition, Clinical Modification, PPM=permanent pacemaker                                         |               |                |

| <b>Supplementary Table 2:</b> List of Elixhauser Comorbidities included in our analysis: |                                   |
|------------------------------------------------------------------------------------------|-----------------------------------|
| 1.                                                                                       | Diabetes mellitus (uncomplicated) |
| 2.                                                                                       | Diabetes mellitus (complicated)   |
| 3.                                                                                       | Hypertension                      |
| 4.                                                                                       | Hypothyroidism                    |
| 5.                                                                                       | Obesity                           |
